# Supplementary material for: A Computational Model of the Ionic Currents, Ca2+ Dynamics and Action Potentials Underlying Contraction of Isolated Uterine Smooth Muscle
Source: PubMed Central journal article supplement (PMC3084699; doi:10.1371/journal.pone.0018685), 2011-04-29
Supplement: pone.0018685.s001.pdf [file pone.0018685.s001.pdf]

## Supporting Information

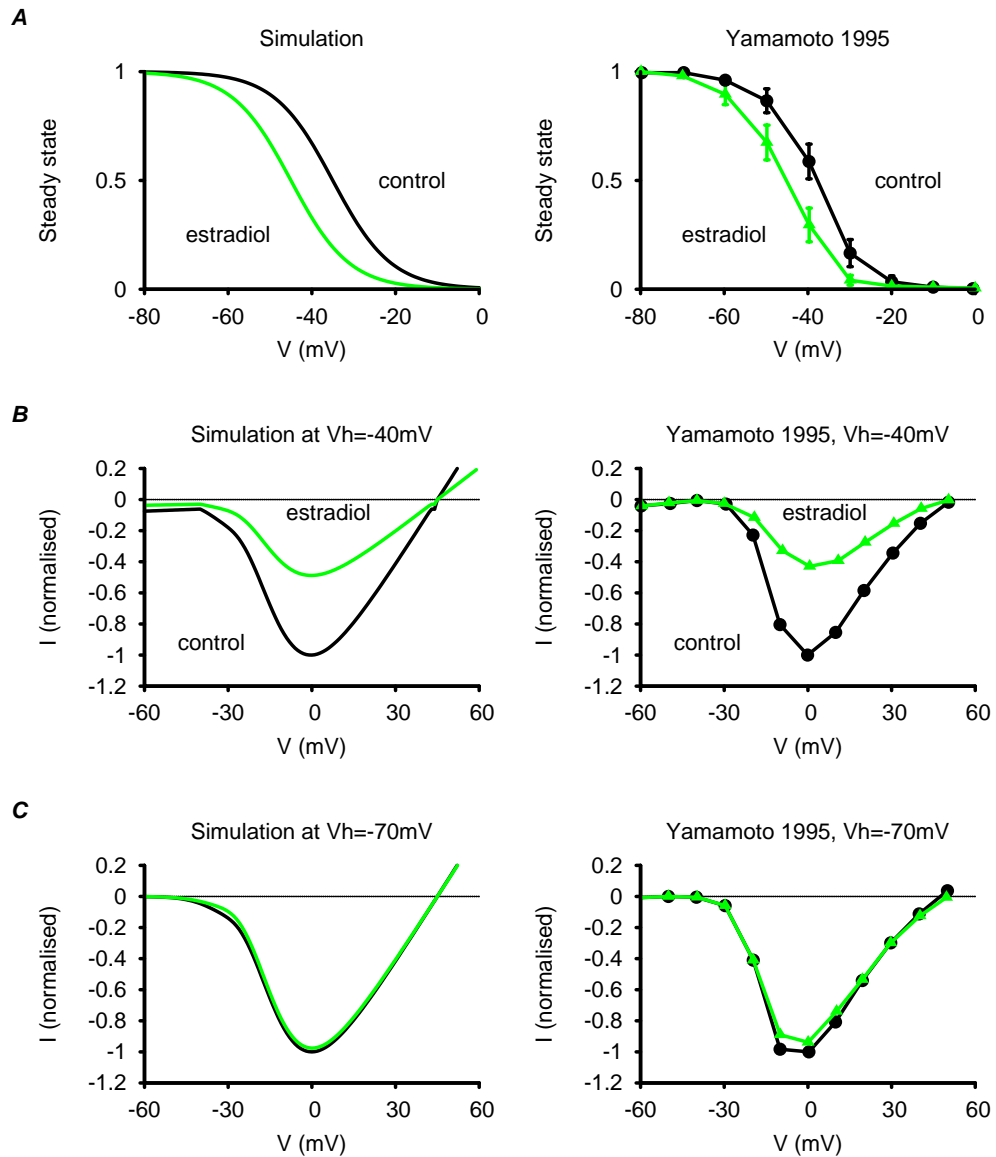

**Figure S1. Simulating the effect of estradiol on the inactivation of myometrial  $I_{CaL}$ .**

Simulations (left panels) reproduced the experimental data (right panels, [30]) indicating that estradiol effects a leftward shift in voltage-dependent inactivation and a reduction in peak current-voltage ( $I$ - $V$ ) relationship from a holding potential ( $V_h$ ) of  $-40\text{mV}$ .  $I_{CaL}$  in control conditions (*black*) and  $I_{CaL}$  in estradiol conditions (*green*). *A*, inactivation steady-states of  $I_{CaL}$ ; *B*,  $I$ - $V$  relationship from  $V_h = -40\text{mV}$ ; *C*,  $I$ - $V$  relationship from  $V_h = -70\text{mV}$ .
