# Supplementary material for: A Computational Model of the Ionic Currents, Ca2+ Dynamics and Action Potentials Underlying Contraction of Isolated Uterine Smooth Muscle
Source: PubMed Central journal article supplement (PMC3084699; doi:10.1371/journal.pone.0018685), 2011-04-29
Supplement: pone.0018685.s002.pdf [file pone.0018685.s002.pdf]

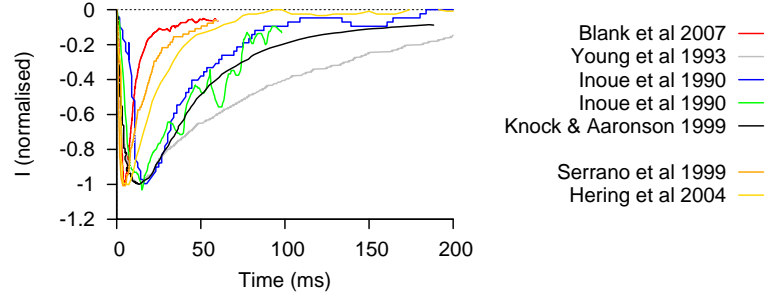

| References                | Cell types                               | ion              | T<br>(°C) | $V_h$<br>(mV) | $V_s$<br>(mV) | Identification<br>Methods                                        |
|---------------------------|------------------------------------------|------------------|-----------|---------------|---------------|------------------------------------------------------------------|
| Blank <i>et al</i> 2007   | human myometrial cells                   | $\text{Ca}^{2+}$ | 22        | -80           | -30           | Nickel, and difference between $V_h = -80$ mV and $V_h = -50$ mV |
| Young <i>et al</i> 1993   | human myometrial cells                   | $\text{Ca}^{2+}$ | 22        | -80           | -20           |                                                                  |
| Inoue <i>et al</i> 1990   | human myometrial cells                   | $\text{Ca}^{2+}$ | RT        | -100          | -20, -40      | difference between $V_h = -100$ mV and $V_h = -50$ mV            |
| Knock & Aaronson 1999     | human myometrial cells                   | $\text{Ba}^{2+}$ | 22        | -80           | -20           | Mibefradil                                                       |
| Serrano <i>et al</i> 1999 | Rat $\alpha 1\text{G}$ gene in HEK cells | $\text{Ca}^{2+}$ | 20        | -100          | -30           |                                                                  |
| Hering <i>et al</i> 2004  | Rat Cav3.1 gene in HEK cells             | $\text{Ca}^{2+}$ | RT        | -100          | -20           |                                                                  |

**Figure S2. Different inactivation kinetics of myometrial  $I_{\text{CaT}}$ .** Experimental time tracings of myometrial ion currents described as  $I_{\text{CaT}}$  from human [13, 18, 28, 47] and rat [43, 44] showed a broad range of inactivation kinetics. All tracings are normalized to their peak value. The table compares specific experimental conditions for each  $I_{\text{CaT}}$  description: the cell types, carrier ion, temperature (T), holding potential ( $V_h$ ), stepping potential ( $V_s$ ), and methods of  $I_{\text{CaT}}$  identification.
