# Supplementary material for: A Computational Model of the Ionic Currents, Ca2+ Dynamics and Action Potentials Underlying Contraction of Isolated Uterine Smooth Muscle
Source: PubMed Central journal article supplement (PMC3084699; doi:10.1371/journal.pone.0018685), 2011-04-29
Supplement: pone.0018685.s003.pdf [file pone.0018685.s003.pdf]

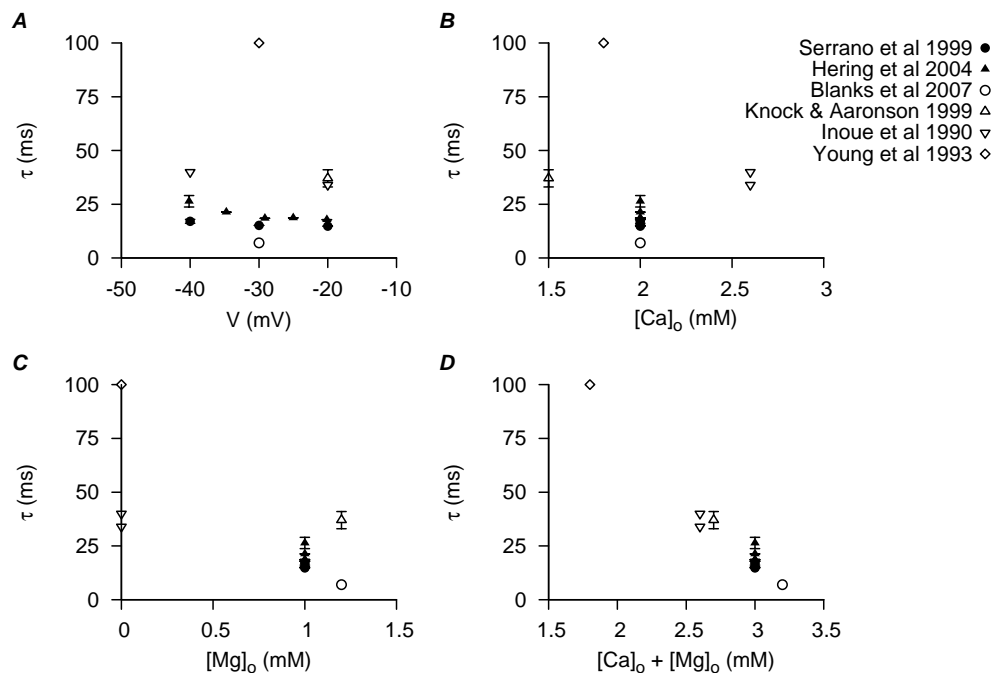

| References                | $V_h$ (mV) | $V_s$ (mV) | $\tau$ (ms)      | $[Ca^{2+}]_o$ (mM) | $[Mg^{2+}]_o$ (mM) |
|---------------------------|------------|------------|------------------|--------------------|--------------------|
| Blank <i>et al</i> 2007   | -80        | -30        | 7                | 2                  | 1.2                |
| Young <i>et al</i> 1993   | -100       | -30        | 100              | 1.8                | 0                  |
| Inoue <i>et al</i> 1990   | -100       | -20        | 34               | 2.6                | 0                  |
| Inoue <i>et al</i> 1990   | -100       | -40        | 40               | 2.6                | 0                  |
| Knock & Aaronson 1999     | -80        | -20        | $37 \pm 4$       | 1.5                | 1.2                |
| Serrano <i>et al</i> 1999 | -100       | -40        | $17.03 \pm 0.93$ | 2                  | 1                  |
| Serrano <i>et al</i> 1999 | -100       | -30        | 15.17            | 2                  | 1                  |
| Serrano <i>et al</i> 1999 | -100       | -20        | 14.77            | 2                  | 1                  |
| Hering <i>et al</i> 2004  | -100       | -40        | $26.37 \pm 2.64$ | 2                  | 1                  |
| Hering <i>et al</i> 2004  | -100       | -35        | 21.32            | 2                  | 1                  |
| Hering <i>et al</i> 2004  | -100       | -30        | 18.46            | 2                  | 1                  |
| Hering <i>et al</i> 2004  | -100       | -25        | 18.68            | 2                  | 1                  |
| Hering <i>et al</i> 2004  | -100       | -20        | 17.80            | 2                  | 1                  |

**Figure S3. Divalent ion concentration versus  $I_{CaT}$  inactivation time constant of rat myometrial  $I_{CaT}$ .** The voltage-dependent time constants of inactivation ( $\tau$ ) for myometrial  $I_{CaT}$  from published records were compared against the voltage step conditions and divalent ion concentrations ( $[Mg^{2+}]_o$  and  $[Ca^{2+}]_o$ ) used in each of the experimental scenarios.  $\tau$  is either taken from the published values or by fitting published raw data tracings with an exponential function from [13, 18, 28, 43, 44, 47]. *A*,  $\tau$  with respect to the stepping voltage  $V_s$  from a holding potential  $V_h$  of either  $-80$  mV or  $-100$  mV. *B*,  $\tau$  with respect to  $[Ca^{2+}]_o$ ; *C*,  $\tau$  with respect to  $[Mg^{2+}]_o$ ; *D*,  $\tau$  with respect to sum of  $[Ca^{2+}]_o$  and  $[Mg^{2+}]_o$ . The inactivation time constant of  $I_{CaT}$  show a stronger association with the combined concentrations of  $[Ca^{2+}]_o$  and  $[Mg^{2+}]_o$  than with only  $[Mg^{2+}]_o$ .
