# Supplementary material for: A Computational Model of the Ionic Currents, Ca2+ Dynamics and Action Potentials Underlying Contraction of Isolated Uterine Smooth Muscle
Source: PubMed Central journal article supplement (PMC3084699; doi:10.1371/journal.pone.0018685), 2011-04-29
Supplement: pone.0018685.s006.pdf [file pone.0018685.s006.pdf]

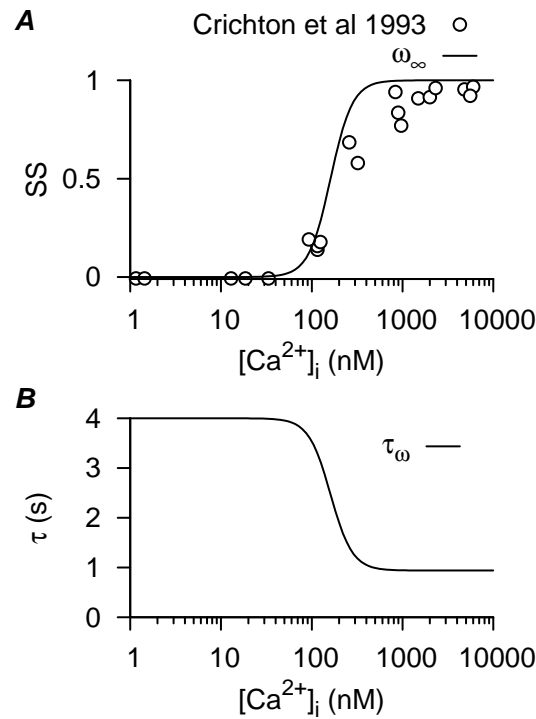

**Figure S6. Modeling the dynamics of  $[Ca^{2+}]_i$ -dependent active force.**  $[Ca^{2+}]_i$ -dependent active force is modeled by a first-ordered differential equation with a dynamical variable ( $\omega$ ) with both its steady-state ( $\omega_{\infty}$ ) and time constant ( $\tau_{\omega}$ ) dependent on  $[Ca^{2+}]_i$ . *A*,  $\omega_{\infty}$  was first approximated using results from Crichton *et al.*, [115] then adjusted to best reproduce results from Burdyga *et al.*, [106,107]; it is fitted using a Hill equation with a half-activation at 161.3 nM and a Hill coefficient of 3.6 (Eq. 104). *B*, the equation for  $\tau_{\omega}$  (Eq. 105) was chosen to best reproduce experimental results [106,107] and gave a maximum of 4 s at low  $[Ca^{2+}]_i$  and a minimum of 0.94 s at high  $[Ca^{2+}]_i$ .
