# Supplementary material for: A Computational Model of the Ionic Currents, Ca2+ Dynamics and Action Potentials Underlying Contraction of Isolated Uterine Smooth Muscle
Source: PubMed Central journal article supplement (PMC3084699; doi:10.1371/journal.pone.0018685), 2011-04-29
Supplement: pone.0018685.s007.pdf [file pone.0018685.s007.pdf]

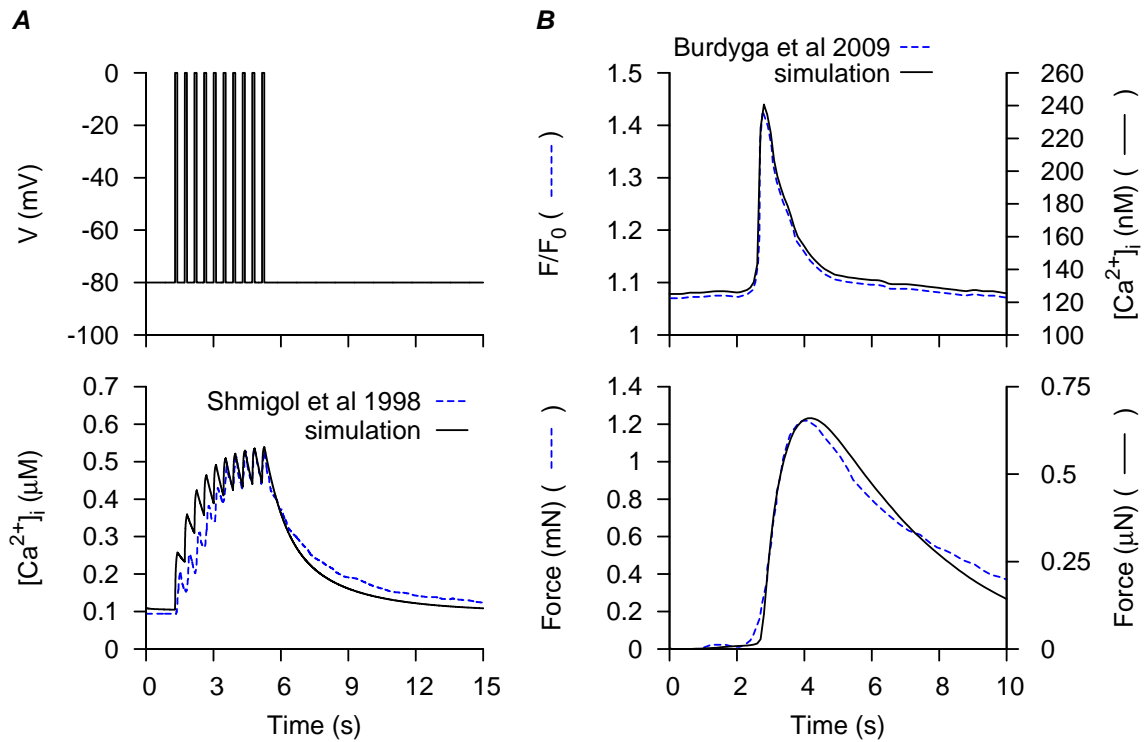

**Figure S7. Modeling simultaneous changes in  $V$  and  $[Ca^{2+}]_i$  or  $[Ca^{2+}]_i$  and force development.** *A*, the modified calcium sub-system was subjected to a burst of ten voltage-clamp pulses from a holding potential of  $-80$  mV to  $0$  mV for  $100$  ms at  $3$  Hz (*top panel*); the evoked calcium tracings (*bottom panel, solid line*) exhibited similar dynamics as experimental results in Shmigol *et al.*, [12] (*dash line*). *B*, the contraction component was commanded by the experimental calcium tracing as control input (*top panel*); values of calcium measurement were transformed into concentration values by assuming  $[Ca^{2+}]_i = 125$  nM at rest and  $\approx 240$  nM at peak when evoked by a single AP. The evoked force tracings (*solid line*) exhibited similar temporal dynamics as experimental results in tissue (*dash line*) (*bottom panel*) [107]; the resting force in the single cell model is set as zero at rest.
