# Supplementary material for: A Computational Model of the Ionic Currents, Ca2+ Dynamics and Action Potentials Underlying Contraction of Isolated Uterine Smooth Muscle
Source: PubMed Central journal article supplement (PMC3084699; doi:10.1371/journal.pone.0018685), 2011-04-29
Supplement: pone.0018685.s008.pdf [file pone.0018685.s008.pdf]

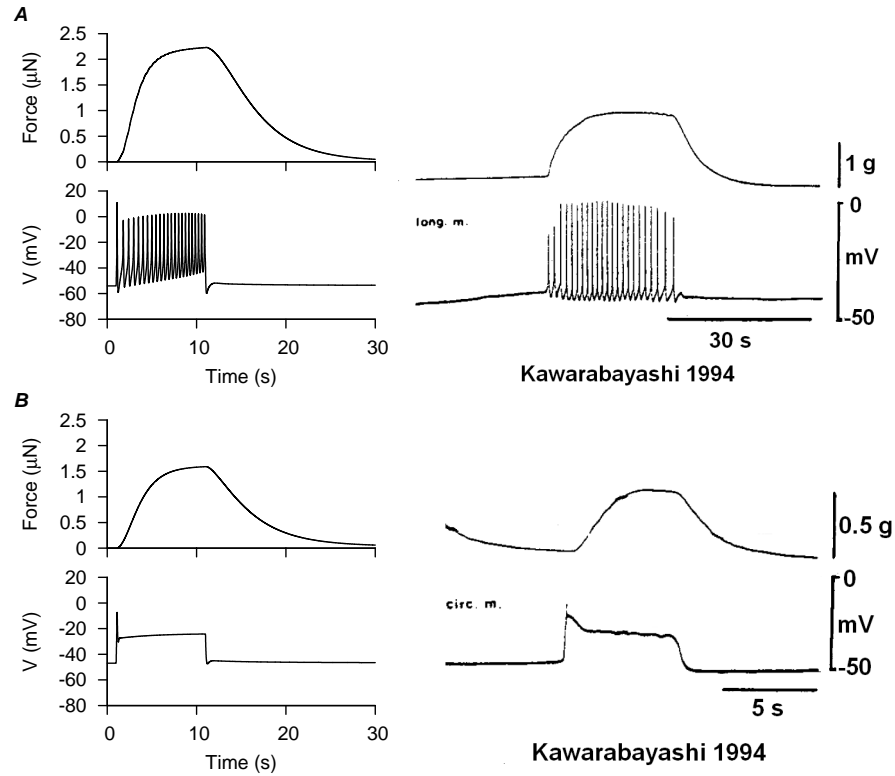

**Figure S8. Modeling force output consequent to spike APs or plateau-like APs.** *A*, a simulated bursting AP and consequent force induced with a 10 s current clamp at  $-0.4 \text{ pA pF}^{-1}$  in comparison to experimental data of rat longitudinal muscle (*right*) [108]. *B*, a simulated plateau-type AP and consequent force (*left*) instigated with a 10 s current clamp at  $-0.4 \text{ pA pF}^{-1}$ , reduced potassium conductances ( $\bar{g}_K = \bar{g}_{KCa} = 0.55 \text{ nS pF}^{-1}$ ) and left-shifted  $I_{CaL}$  half inactivation at  $-50 \text{ mV}$  compared to panel A, in comparison to experimental data (*right*) [108].
