# Supplementary material for: A Computational Model of the Ionic Currents, Ca2+ Dynamics and Action Potentials Underlying Contraction of Isolated Uterine Smooth Muscle
Source: PubMed Central journal article supplement (PMC3084699; doi:10.1371/journal.pone.0018685), 2011-04-29
Supplement: pone.0018685.s012.pdf [file pone.0018685.s012.pdf]

Table S4. Constant parameter values used in model simulations.

| Parameters       | values                                    |
|------------------|-------------------------------------------|
| T                | 308 K                                     |
| F                | 96485 C mol <sup>-1</sup>                 |
| R                | 8.314 J K <sup>-1</sup> mol <sup>-1</sup> |
| $z_{Na}$         | 1                                         |
| $z_K$            | 1                                         |
| $z_{Ca}$         | 2                                         |
| $[Na^+]_i$       | 4 mM                                      |
| $[Na^+]_o$       | 130 mM                                    |
| $[K^+]_i$        | 140 mM                                    |
| $[K^+]_o$        | 6 mM                                      |
| $[Cl^-]_i$       | 46 mM                                     |
| $[Cl^-]_o$       | 130 mM                                    |
| $[Ca^{2+}]_o$    | 2.5 mM                                    |
| $[Mg^{2+}]_o$    | 0.5 mM                                    |
| $C_m$            | 1 $\mu$ F cm <sup>-2</sup>                |
| $A_c/V_c$        | 4 cm <sup>-1</sup>                        |
| $\beta$          | 0.015                                     |
| $\bar{J}_{PMCA}$ | 3.5e <sup>-7</sup> mM ms <sup>-1</sup>    |
| $K_{m,PMCA}$     | 0.5 $\mu$ M                               |
| $n_{PMCA}$       | 2                                         |
| $\bar{J}_{NaCa}$ | 3.5e <sup>-6</sup> mM ms <sup>-1</sup>    |
| $K_{m,Allo}$     | 3 $\mu$ M                                 |
| $n_{Allo}$       | 4                                         |
| $k_{sat}$        | 0.27                                      |
| $\gamma$         | 0.35                                      |
| $K_{m,Nai}$      | 30.0 mM                                   |
| $K_{m,Cai}$      | 7 $\mu$ M                                 |
| $K_{m,Nao}$      | 87.5 mM                                   |
| $K_{m,Cao}$      | 1.3 mM                                    |
| $\bar{g}_{CaL}$  | 0.6 nS pF <sup>-1</sup>                   |
| $E_{CaL}$        | 45 mV                                     |
| $K_{m,CaL}$      | 1 $\mu$ M                                 |
| $\bar{g}_{CaT}$  | 0.058 nS pF <sup>-1</sup>                 |
| $E_{CaT}$        | 42 mV                                     |
| $\bar{g}_{Na}$   | 0 – 0.12 nS pF <sup>-1</sup>              |
| $\bar{g}_h$      | 0.0542 nS pF <sup>-1</sup>                |
| $\bar{g}_K$      | 0.8 nS pF <sup>-1</sup>                   |
| $\bar{g}_b$      | 0.004 nS pF <sup>-1</sup>                 |
| $\bar{g}_{K1}$   | 0.65 $\bar{g}_K$                          |
| $\bar{g}_{K2}$   | 0.04 $\bar{g}_K$                          |
| $\bar{g}_{Ka}$   | 0.2 $\bar{g}_K$                           |
| $\bar{g}_{BK}$   | $\bar{g}_K$                               |
| $p_a$            | 0.2                                       |
| $p_b$            | 0.1                                       |
| $\bar{g}_L$      | 0 nS pF <sup>-1</sup>                     |

Continued on next page

**Table S4 – continued from previous page**

| <b>Parameters</b>               | <b>values</b>              |
|---------------------------------|----------------------------|
| $\bar{g}_{\text{NS}}$           | 0.0123 nS pF <sup>-1</sup> |
| $P_{\text{Na}}/P_{\text{K}}$    | 0.35                       |
| $P_{\text{Ca}} : P_{\text{Cs}}$ | 0.89                       |
| $P_{\text{Na}} : P_{\text{Cs}}$ | 0.9                        |
| $P_{\text{K}} : P_{\text{Cs}}$  | 1.3                        |
| $K_{d,\text{Mg}}$               | 0.28 mM                    |
| $\bar{g}_{\text{Cl}}$           | 0.1875 nS pF <sup>-1</sup> |
| $\bar{g}_{\text{NaK}}$          | 1.7 nS pF <sup>-1</sup>    |
| $K_{d,\text{K}}$                | 2.0 mM                     |
| $n_{\text{K}}$                  | 1.5                        |
| $K_{m,\text{Na}}$               | 22.0 mM                    |
| $n_{\text{Na}}$                 | 2                          |
